# Supplementary material
Source: Springer Nature journal article supplement (https://www.springermedizin.de/resource/supplementary/12889_2008_1492_MOESM1_ESM.pdf/9504406)

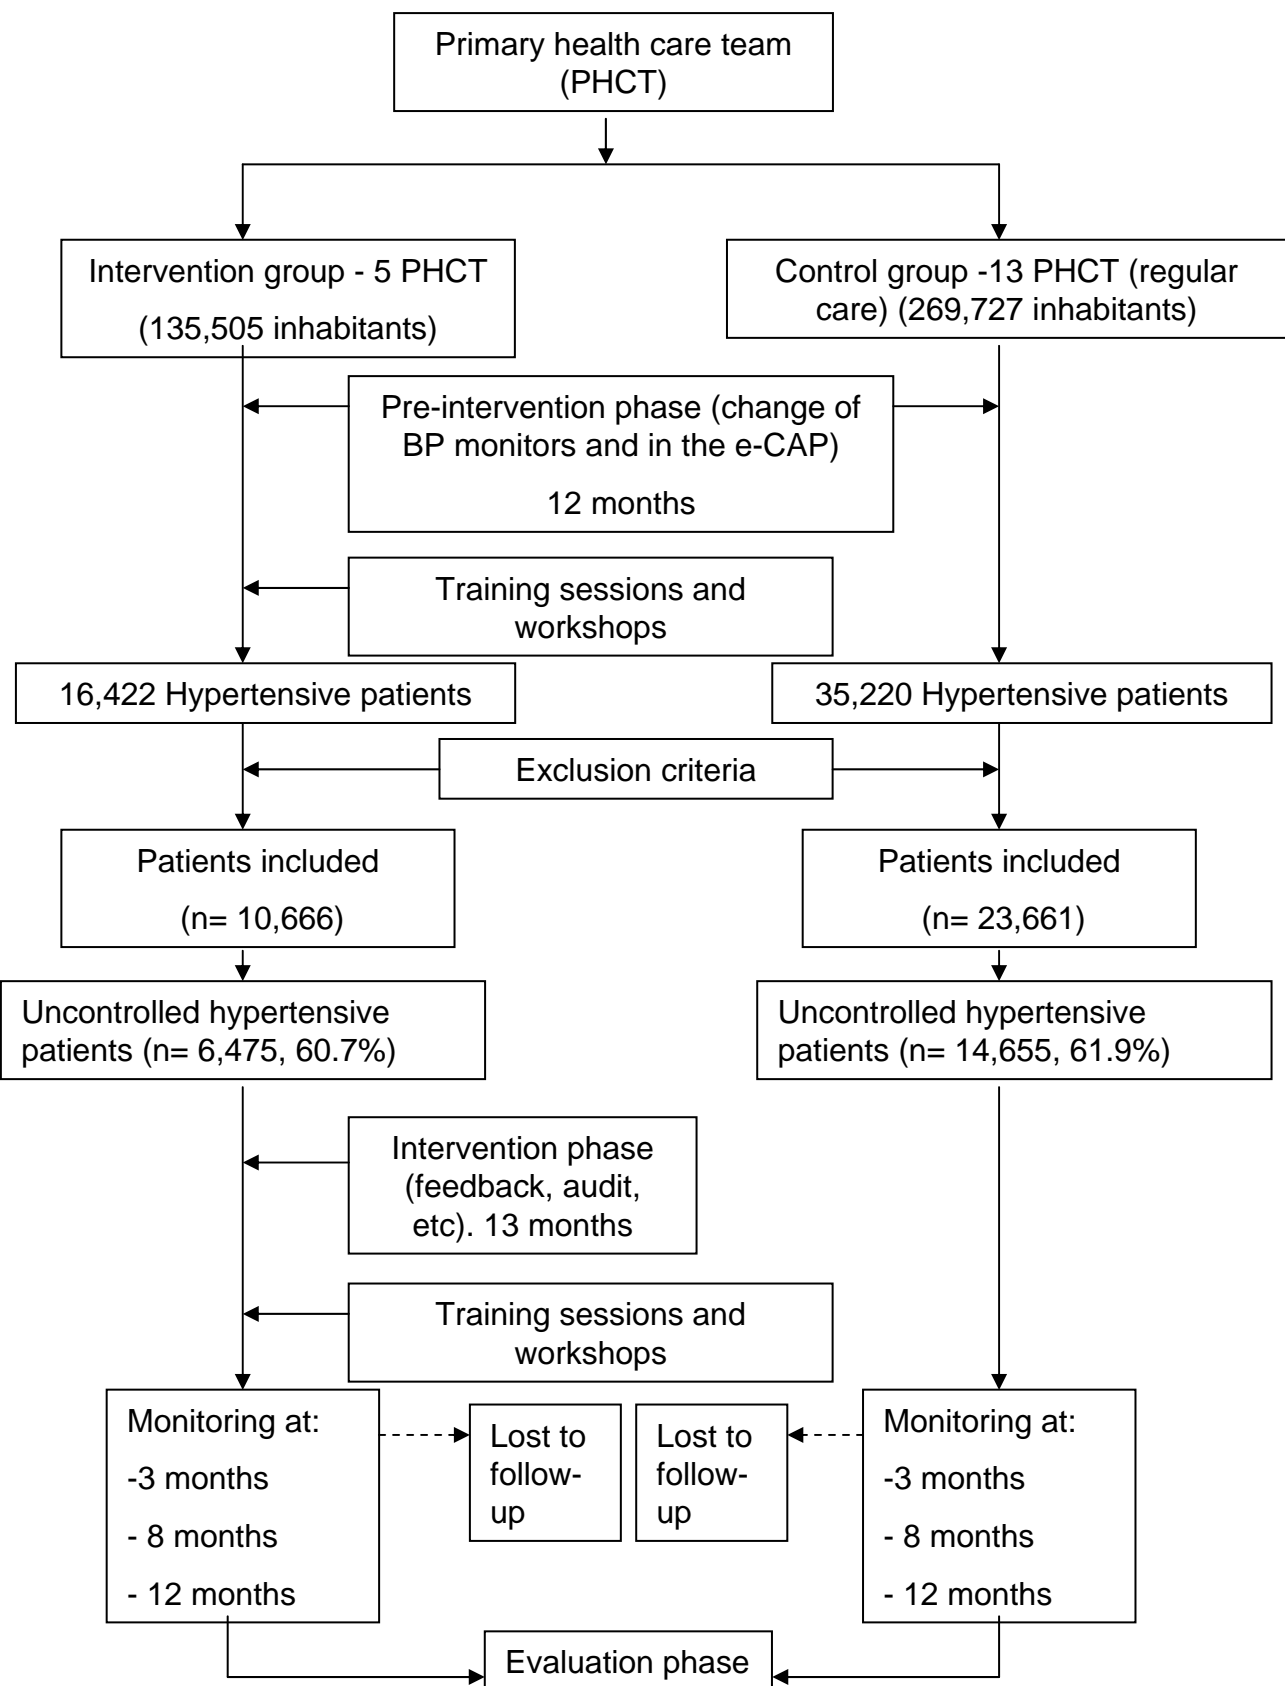

Supplement: MOESM1 [file 9504406]
